# Supplementary material for: One-pot self-assembly preparation of thiol-functionalized poly(3,4-ethylenedioxythiophene) hollow nanosphere/Au composites, and their electrocatalytic properties
Source: Royal Society of Chemistry journal article supplement (doi:10.1039/d1ra06732j), 2021-01-01
Supplement: d1ra06732j1.pdf [file d1ra06732j1.pdf]

ARTICLE

## One-Pot Self-Assemble Preparation of Thiol-Functionalized Poly(3,4-ethylenedioxythiophene) hollow nanospheres/Au Composites, and Its Electrocatalytic Properties

Received 00th January 20xx,  
 Accepted 00th January 20xx

DOI: 10.1039/x0xx00000x

Ahmat Ali,<sup>a</sup> Ruxangul Jamal,<sup>b</sup> Tursun Abdiryim<sup>\*b</sup>

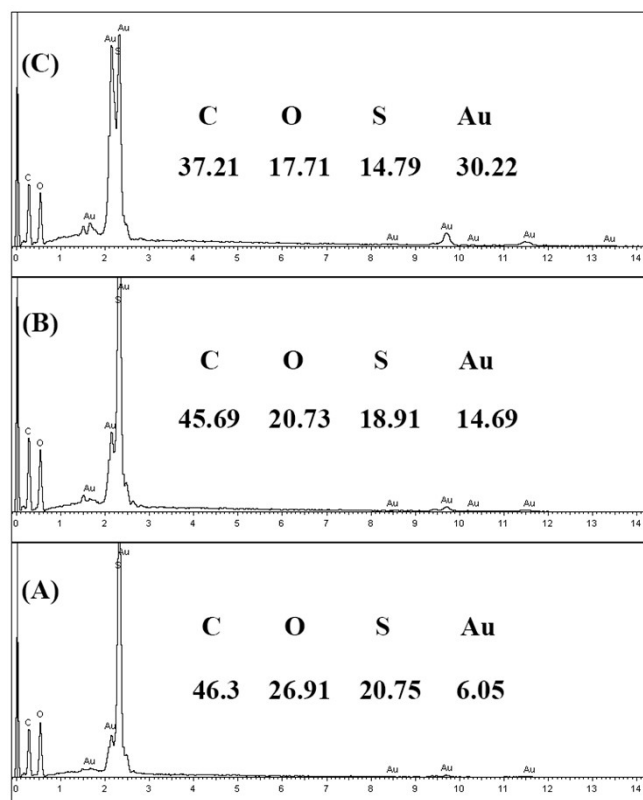

Fig. S1 EDX of Poly(EDOT-MeSH) hollow nanospheres/Au composites.

**Table S1** Performances of Poly(EDOTMeSH)/Au(30 wt%) modified electrode for detection of AA, DA, UA and NO<sub>2</sub><sup>-</sup>.

| Sample                       | Linear response range(μM) | Linear regression equation | R <sup>2</sup> | Limit of detection(μM) |
|------------------------------|---------------------------|----------------------------|----------------|------------------------|
| AA                           | 0.1-650                   | y=0.019C+0.061             | 0.988          | 0.2                    |
| DA                           | 0.05-100                  | y=0.016C+0.19              | 0.995          | 0.02                   |
| UA                           | 100-800                   | y=0.008C+1.03              | 0.998          |                        |
| NO <sub>2</sub> <sup>-</sup> | 0.1-600                   | y=0.012C+0.29              | 0.996          | 0.08                   |
|                              | 0.2-300                   | y=0.008C+0.17              | 0.998          | 0.05                   |

<sup>a</sup>. College of Chemistry and Environmental Engineering, Xinjiang Institute of Engineering, Urumqi 830023, Xinjiang Uygur Autonomous Region, China

<sup>b</sup>. Key Laboratory of Functional Polymers, Xinjiang University, Urumqi 830046, People's Republic of China

c Footnotes relating to the title and/or authors should appear here.

Electronic Supplementary Information (ESI) available: [details of any supplementary information available should be included here]. See DOI: 10.1039/x0xx00000x
